# Supplementary material for: Controllable Fabrication of SiC@C-Fe3O4 Hybrids and Their Excellent Electromagnetic Absorption Properties
Source: Nanomaterials (Basel). 2021 Dec 18;11(12):3438. doi: 10.3390/nano11123438 (PMC8706827; doi:10.3390/nano11123438)
Supplement: Supplementary file 1 [file nanomaterials-11-03438-s001.zip › nanomaterials-1472434-supplementary.pdf]

# Controllable Fabrication of SiC@C-Fe<sub>3</sub>O<sub>4</sub> Hybrids and Their Excellent Electromagnetic Absorption Properties

Liqun Duan<sup>1,\*</sup>, Xiaoqing Dai<sup>1</sup>, Fan Wu<sup>2,\*</sup>, Aming Xie<sup>2</sup>, Jian-An Wu<sup>1</sup>, Minqian Sun<sup>1</sup> and Yilu Xia<sup>1</sup>

- <sup>1</sup> State Key Laboratory of Disaster Prevention & Mitigation of Explosion & Impact, Army Engineering University of PLA, Nanjing 210007, China; dxq38@sohu.com (X.D.);  
uniquewujianan@163.com (J.-A.W.); emmassun@hotmail.com (M.S.);  
xiayilu\_lugongda@163.com (Y.X.)  
<sup>2</sup> School of Mechanical Engineering, Nanjing University of Science & Technology, Nanjing 210094, China; xieaming@njust.edu.cn  
\* Correspondence: duanliqun5990379@163.com (L.D.); wufan@njust.edu.cn (F.W.)

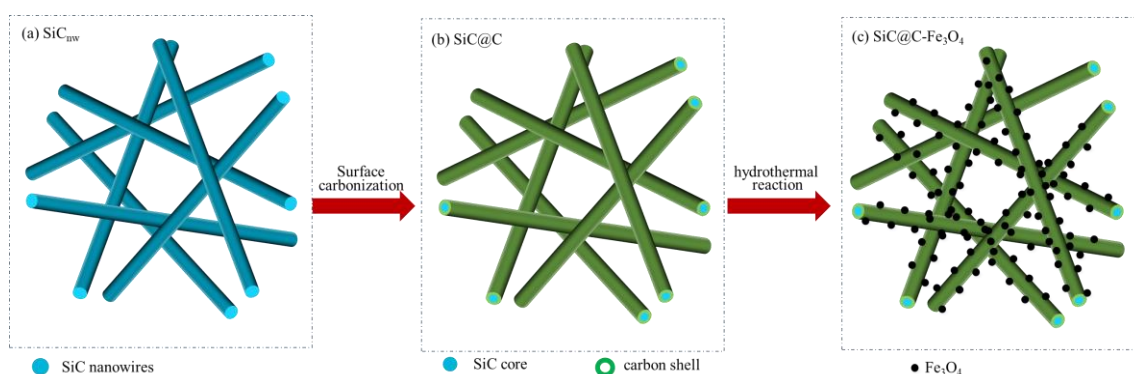

Figure S1. Schematic illustration for fabrication of SCF hybrids.

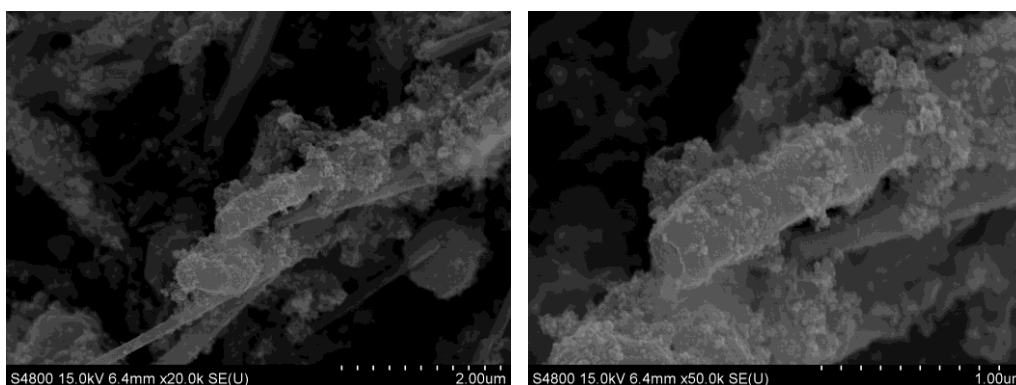

Figure S2. SEM images of SCF1-1 sample

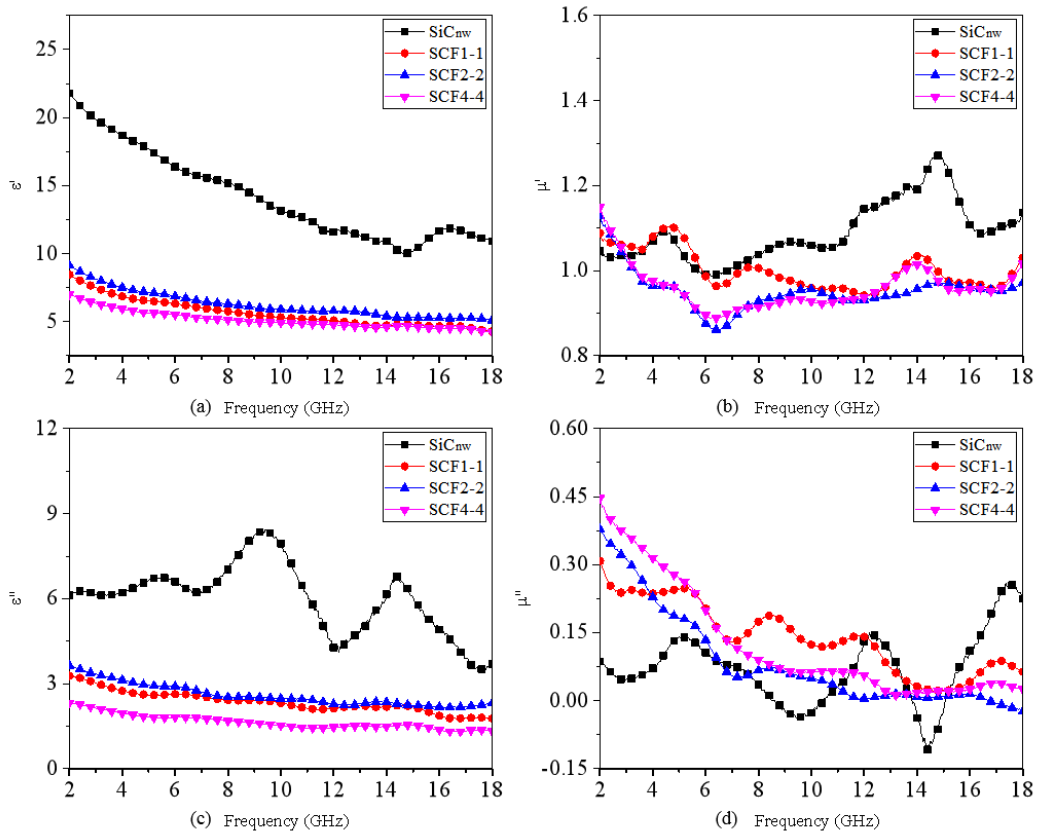

**Figure S3.** The complex permittivity and permeability characterizations of SiC<sub>nw</sub> and SCF samples with the same loading weight of 40%.

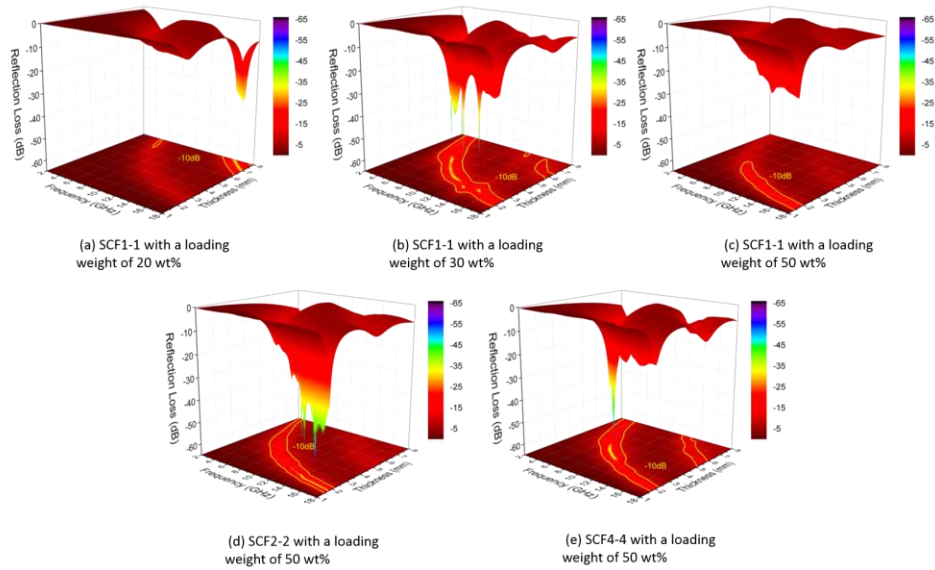

**Figure S4.** 3D-RL plots of the SCF samples with other loading weights

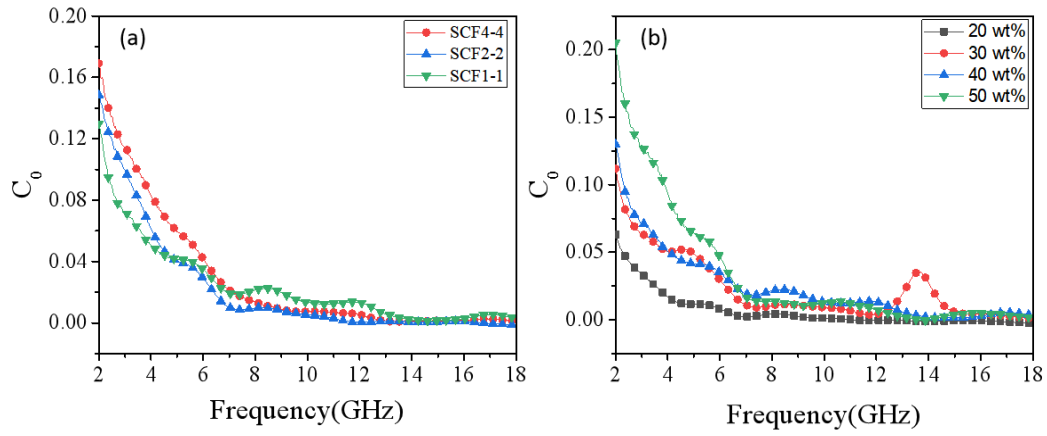

**Figure S5.** Frequency dependence of the  $C_0$  of the SCF samples with a loading weight of 40% (a) as well as the SCF1-1 sample with different loading weights (b).

**Table S1.** Chemical compositions of pristine  $\text{SiC}_{\text{nw}}$  and SCF hybrids by EDS technique

| Samples                  | C<br>(at.%) | O<br>(at.%) | Si<br>(at.%) | Fe<br>(at.%) | *<br>(at.%) |
|--------------------------|-------------|-------------|--------------|--------------|-------------|
| $\text{SiC}_{\text{nw}}$ | 44.17±12.00 | 14.37±2.77  | 41.42±9.23   | -            | 0.04±0.04   |
| SCF1-1                   | 58.97±6.49  | 18.46±1.34  | 15.10±3.39   | 7.47±3.02    | -           |
| SCF2-2                   | 51.83±3.86  | 23.11±6.85  | 13.50±6.85   | 11.56±0.95   | -           |
| SCF4-4                   | 31.77±2.59  | 35.73±1.75  | 6.65±0.41    | 25.85±1.52   | -           |

\* indicates impurity elements, such as Ca, which is not detected every time.
